# Supplementary material for: Assessment of Nutritional Value and Maillard Reaction in Different Gluten-Free Pasta
Source: MDPI journal article supplement (doi:10.3390/foods12061221), 2023-03-13
Supplement: s1 [file s1]

**Table S1.** Instrumental conditions for chromatographic separation of amino acids.

| Mobile Phase (0.250 mL/min) |                      |                 |              | Time/Potential waveform |               |             |
|-----------------------------|----------------------|-----------------|--------------|-------------------------|---------------|-------------|
| Time (min)                  | H <sub>2</sub> O (%) | NaOH 250 mM (%) | NaOAc 1M (%) | Time (sec)              | Potential (V) | Integration |
| 0.0                         | 80                   | 20              | 0            | 0.00                    | + 0.13        | start       |
| 2.0                         | 80                   | 20              | 0            | 0.04                    | + 0.13        |             |
| 12.0                        | 80                   | 20              | 0            | 0.05                    | + 0.28        |             |
| 16.0                        | 68                   | 32              | 0            | 0.11                    | + 0.28        |             |
| 24.0                        | 36                   | 24              | 40           | 0.12                    | + 0.60        |             |
| 40.0                        | 36                   | 24              | 40           | 0.41                    | + 0.60        |             |
| 40.1                        | 20                   | 80              | 0            | 0.42                    | + 0.28        | end         |
| 42.1                        | 20                   | 80              | 0            | 0.56                    | + 0.28        |             |
| 42.2                        | 80                   | 20              | 0            | 0.57                    | − 1.67        |             |
| 62.0                        | 80                   | 20              | 0            | 0.58                    | − 1.67        |             |
|                             |                      |                 |              | 0.59                    | + 0.93        |             |
|                             |                      |                 |              | 0.60                    | + 0.13        |             |
